# Supplementary material for: Aggregation behavior of novel heptamethine cyanine dyes upon their binding to native and fibrillar lysozyme
Source: Royal Society of Chemistry journal article supplement (doi:10.1039/c7mb00185a), 2017-04-04
Supplement: c7mb00185a1.pdf [file c7mb00185a1.pdf]

## Supporting information

Table S1

Quantum-chemical characteristics of AK7-5 and AK7-6 (PM6, MOPAC)

| Dye          | $CA$ ,<br>$\text{\AA}^2$ | $CV$ , $\text{\AA}^3$ | $E_{HOMO}$ , eV | $E_{LUMO}$ , eV | $L$ , $\text{\AA}$ | $CLogP$ | $W$ ,<br>$\text{\AA}$ | $H$ ,<br>$\text{\AA}$ | $\mu_g$ , D |
|--------------|--------------------------|-----------------------|-----------------|-----------------|--------------------|---------|-----------------------|-----------------------|-------------|
| <b>AK7-5</b> | 583                      | 715                   | -9.966          | -4.462          | 20.50              | 5.40    | 12.65                 | 4.68                  | 1.68        |
| <b>AK7-6</b> | 592                      | 723                   | -9.937          | -4.459          | 20.33              | 5.51    | 11.00                 | 5.88                  | 3.39        |

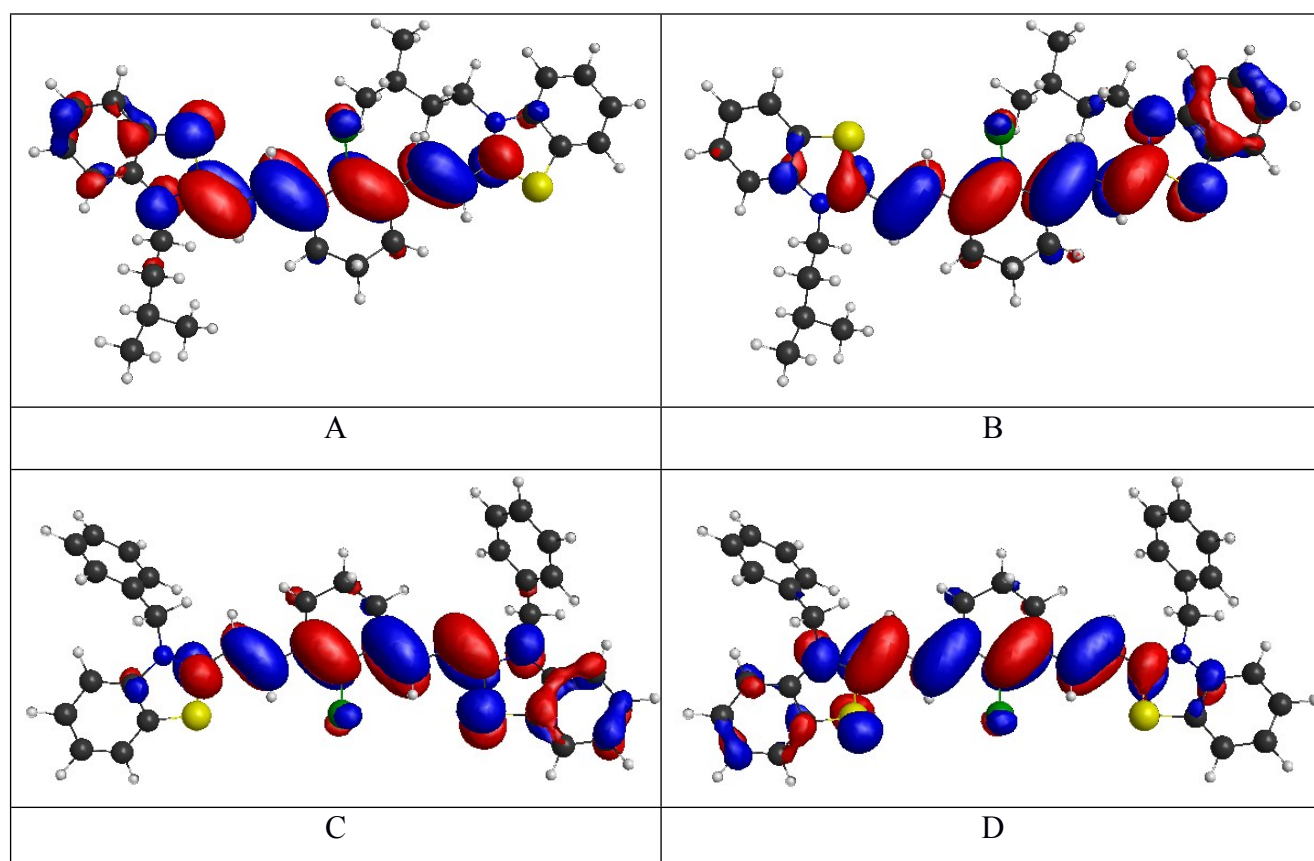

**Figure S1.** HOMO-153 (A), LUMO-154 (B) of AK7-5, and HOMO-161 (C), LUMO-162 (D) of AK7-6. The optimized conformations of the dyes were calculated, using AM1 method with added polarization (1) and diffuse (1) functions on heavy atoms, and a polarization function on hydrogen atoms

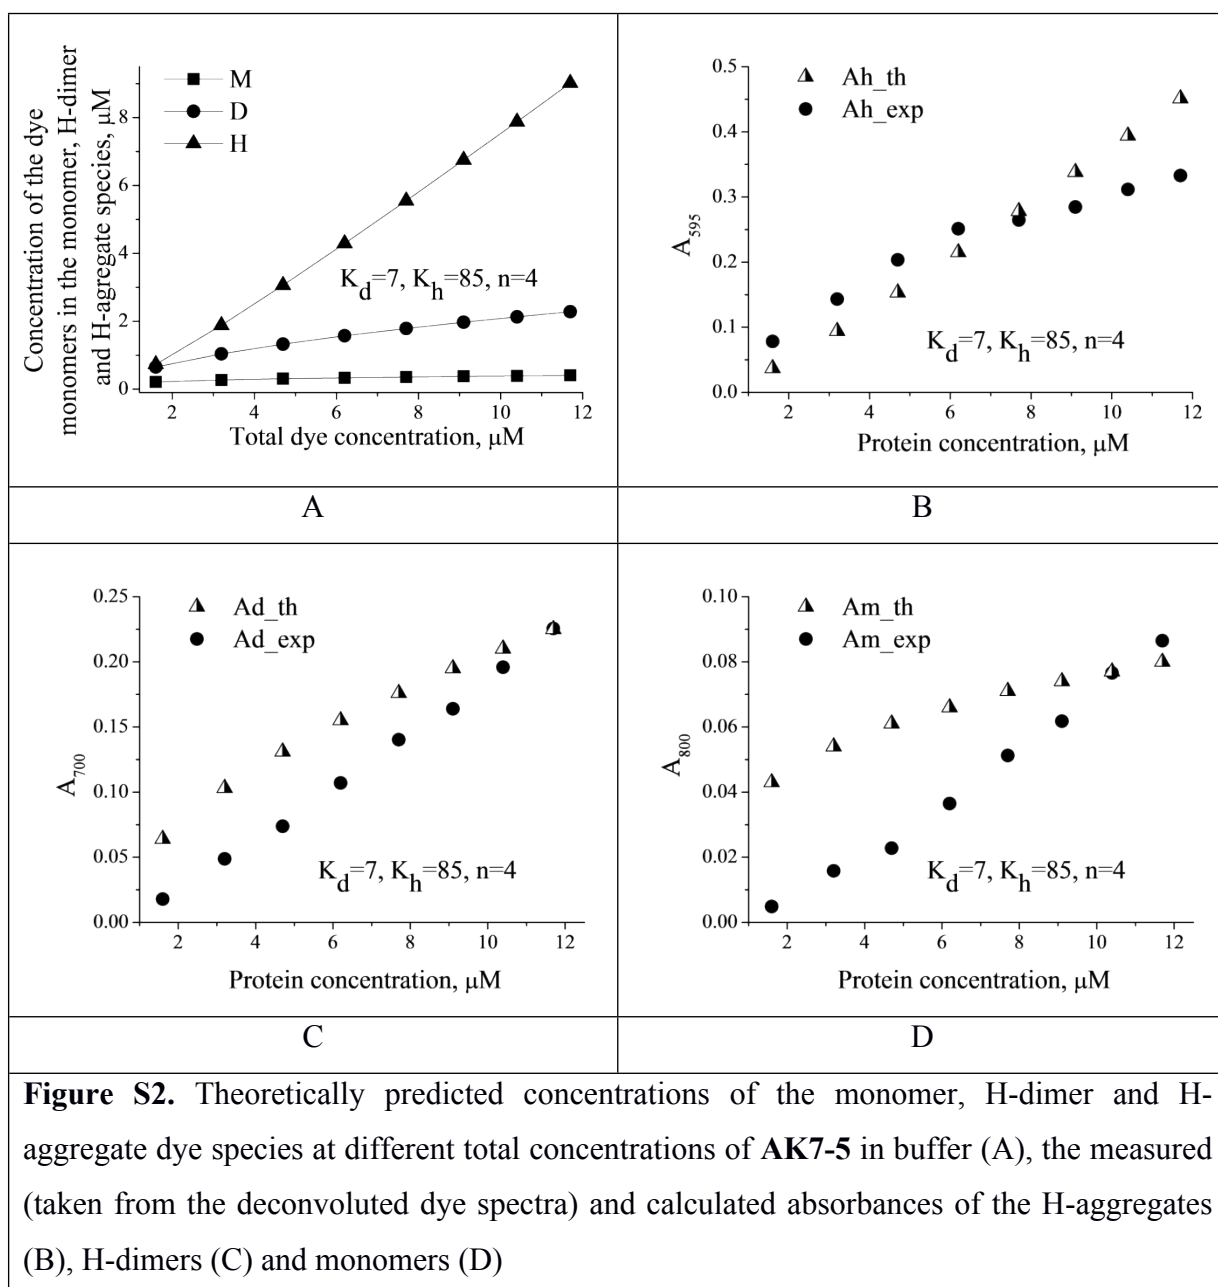

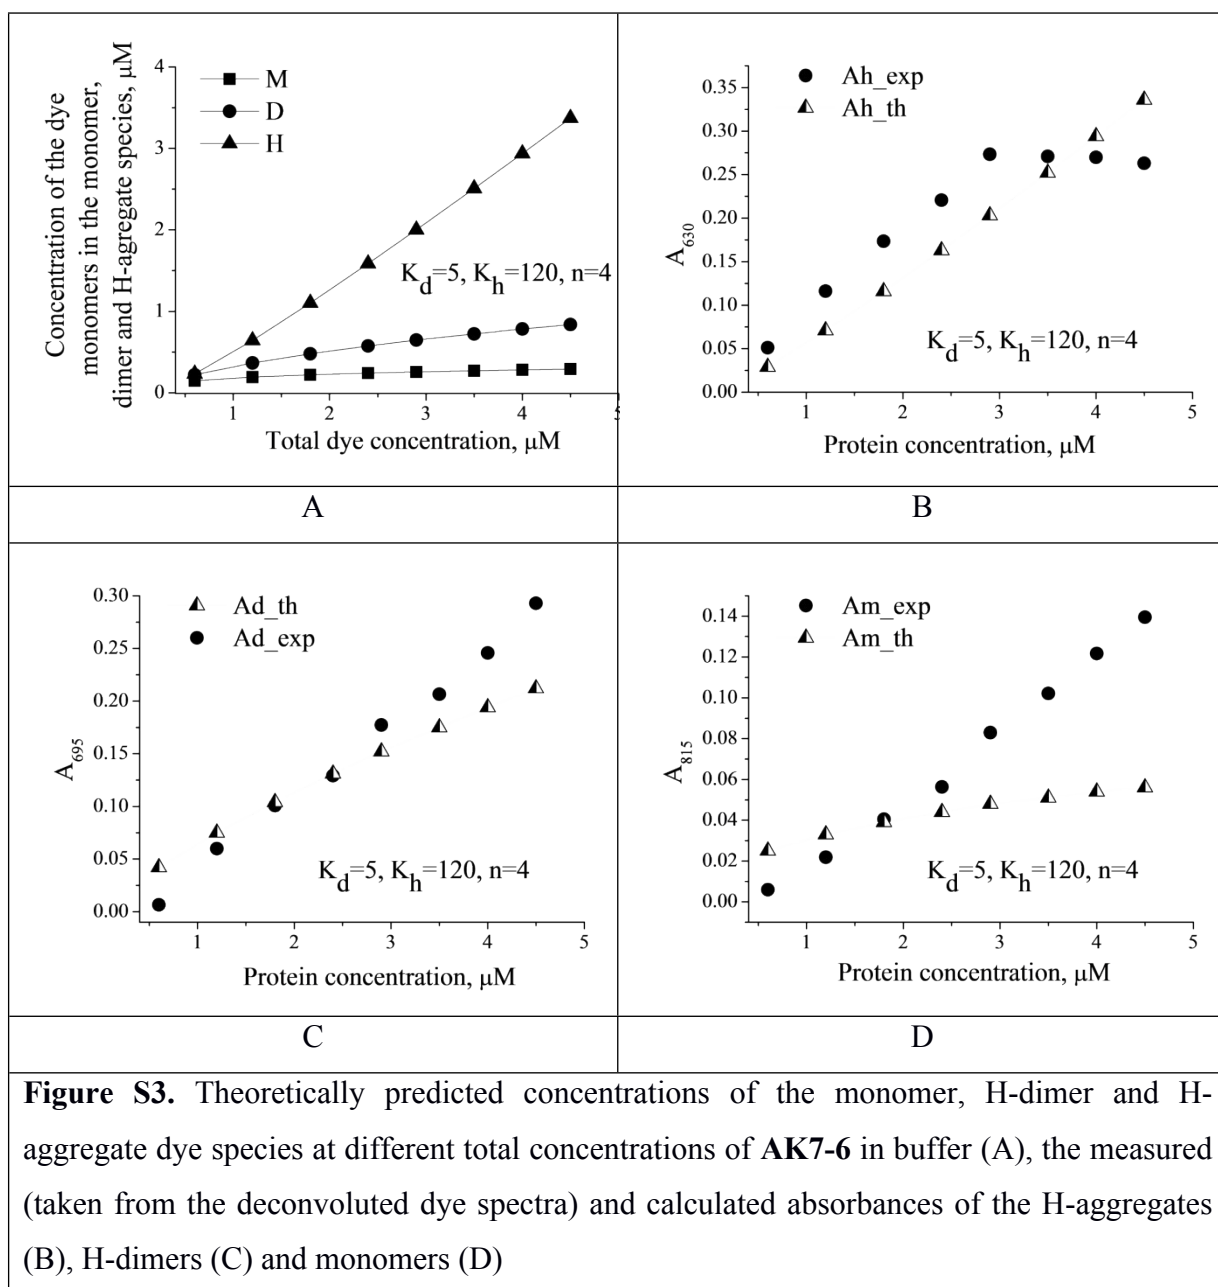

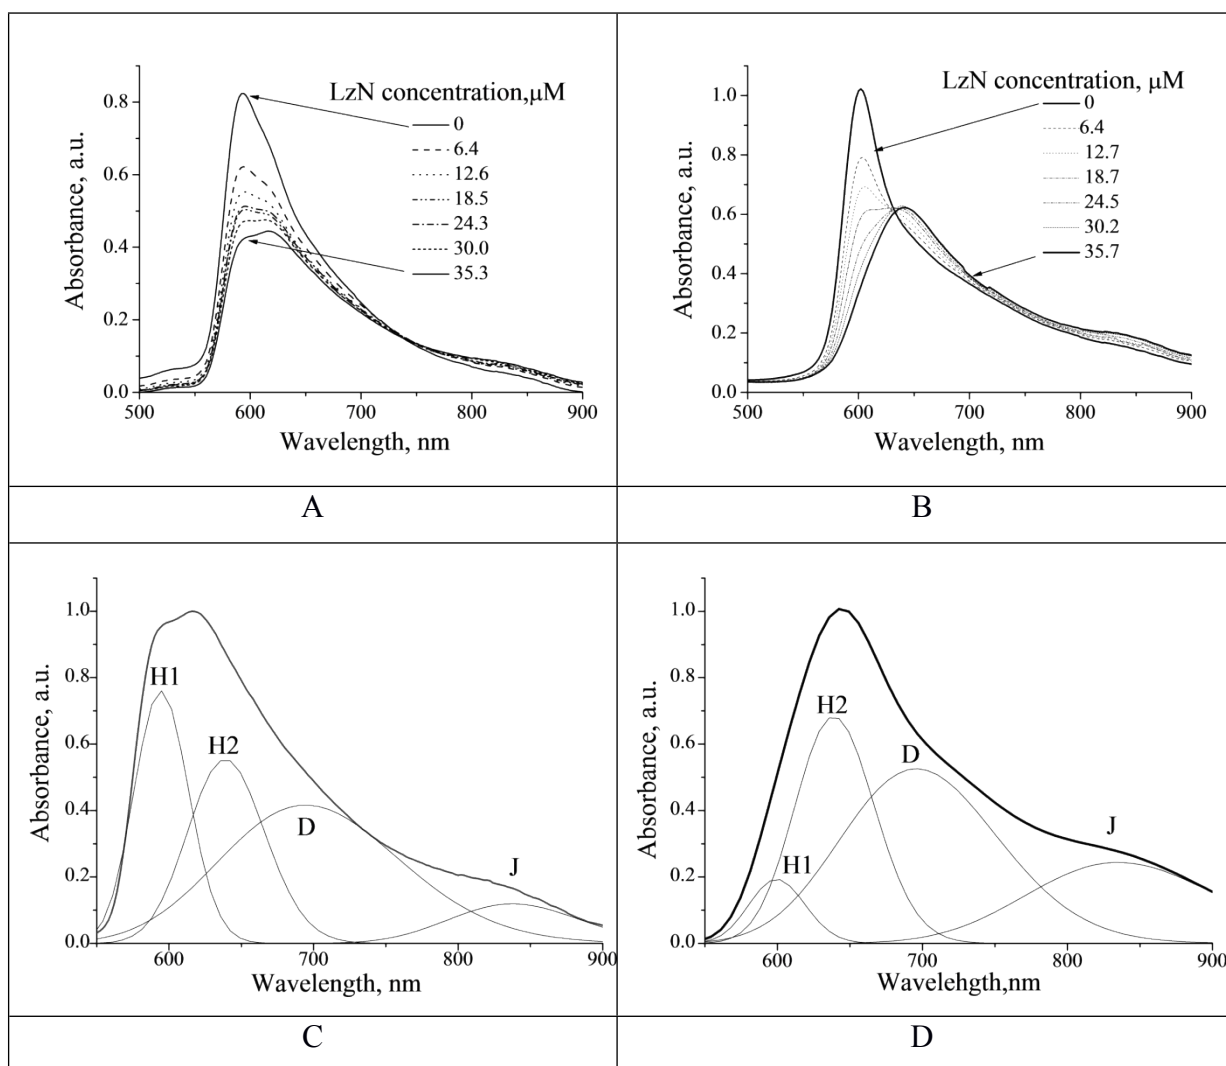

**Figure S4.** Absorption spectra of AK7-5 (A) and AK7-6 (B) at increasing concentration of the native lysozyme (LzN). Normalized absorption spectra of AK7-5 (C) and AK7-6 (D) in the presence of 35.3 μM (C) and 35.7 μM (D) of the native lysozyme. AK7-5 and AK7-6 concentrations were 12.2 and 13.5 μM, respectively

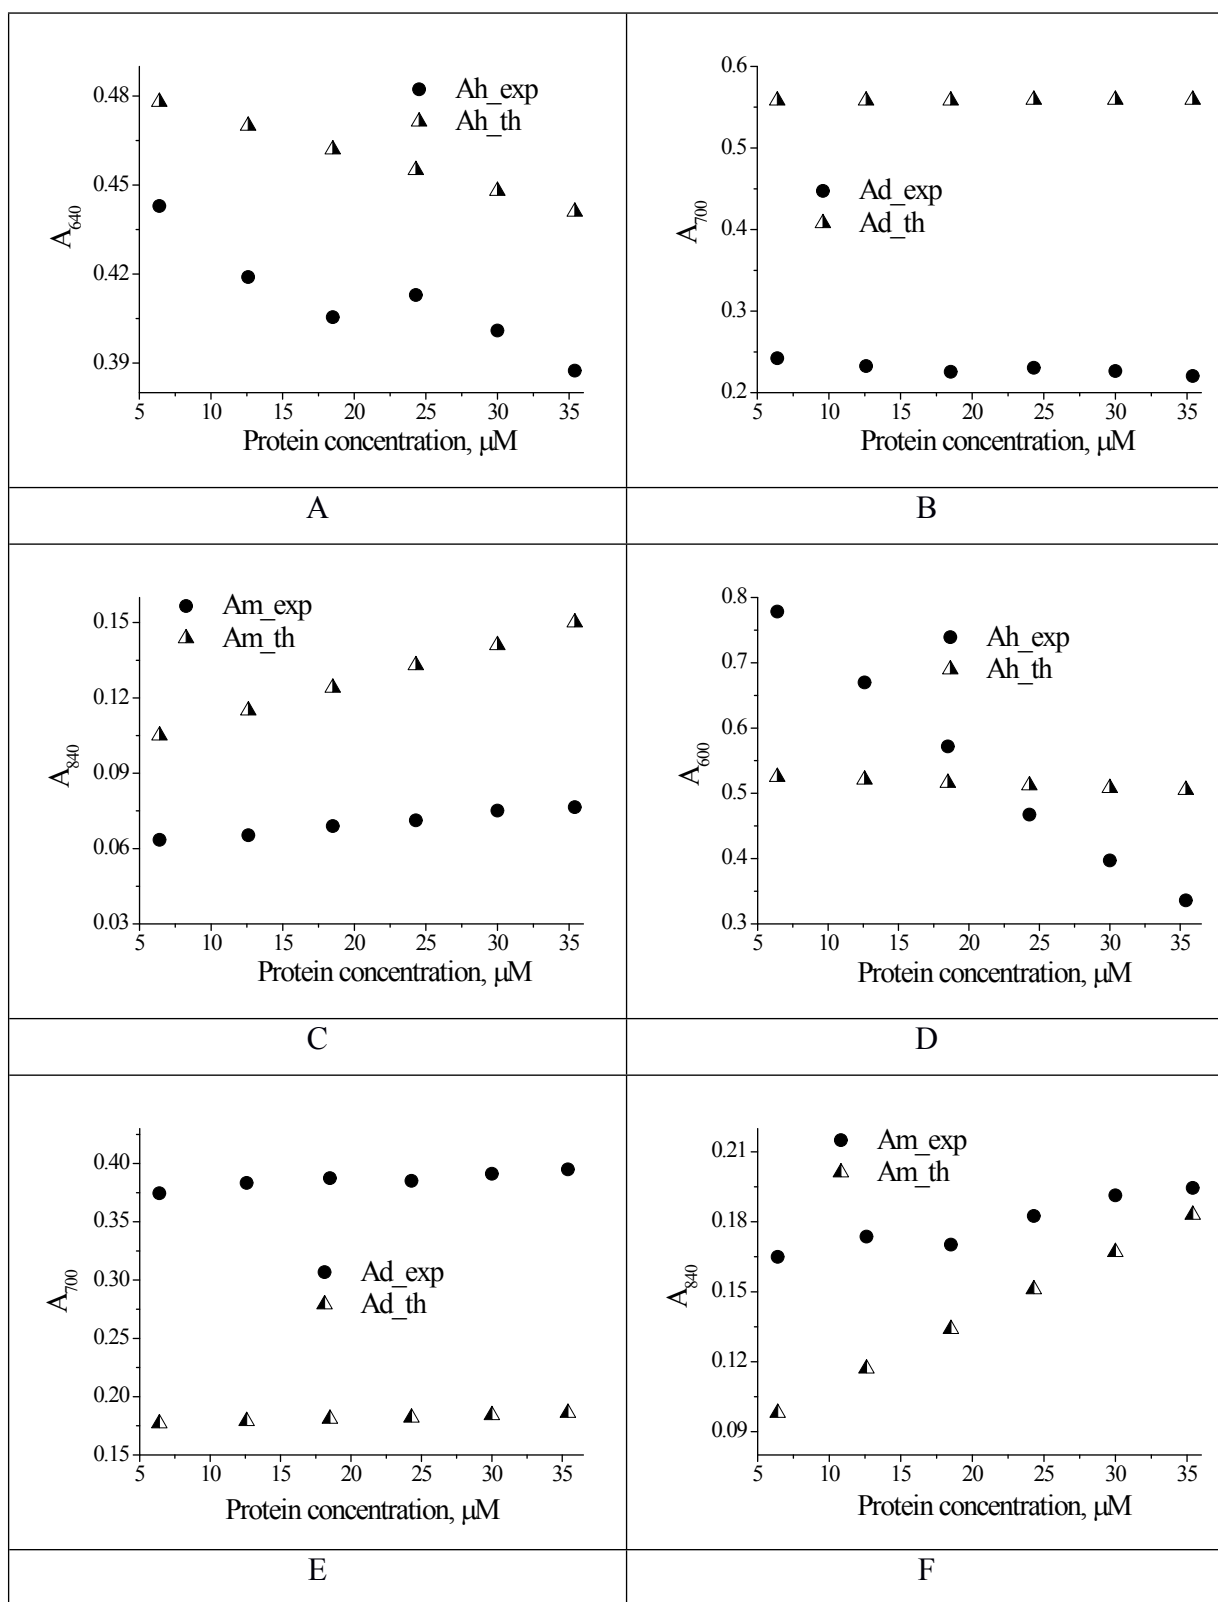

**Figure S5.** The measured (Am\_exp) and theoretically predicted (Am\_th) absorbances of the AK7-5/ AK7-6 H-aggregates (A,D), H-dimers (B,E) and monomers (C,F) in the presence of the native lysozyme calculated using the following sets of parameters:

$$\{K_b = 0.02 \mu\text{M}^{-1}, m = 1, K_h = 85, K_d = 7 \mu\text{M}^{-1}, n = 4\} /$$

$$\{K_b = 0.04 \mu\text{M}^{-1}, m = 1, K_h = 120, K_d = 5 \mu\text{M}^{-1}, n = 4\}$$
